# Supplementary material for: Expression of OsMYB55 in maize activates stress-responsive genes and enhances heat and drought tolerance
Source: PubMed Central journal article supplement (PMC4850646; doi:10.1186/s12864-016-2659-5), 2016-04-29
Supplement: 12864_2016_2659_MOESM1_ESM.pdf [file 12864_2016_2659_MOESM1_ESM.pdf]

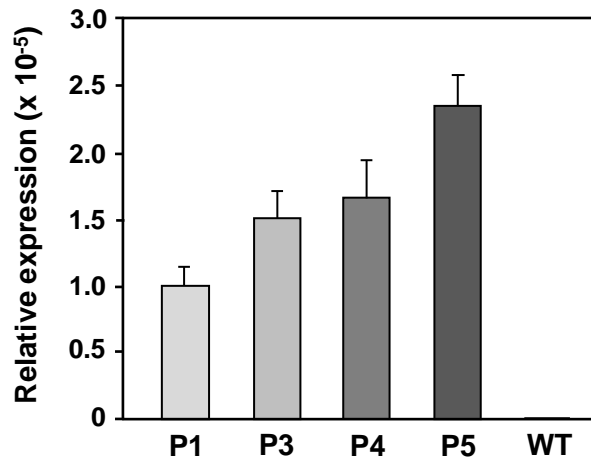

**Additional file 1.** Transgene expression in over-expression lines. Relative expression of OsMYB55 in over-expression lines. Bars represent means  $\pm$  SE (three biological replicates and two technical replicates).
