# Supplementary material for: Expression of OsMYB55 in maize activates stress-responsive genes and enhances heat and drought tolerance
Source: PubMed Central journal article supplement (PMC4850646; doi:10.1186/s12864-016-2659-5), 2016-04-29
Supplement: 12864_2016_2659_MOESM8_ESM.pdf [file 12864_2016_2659_MOESM8_ESM.pdf]

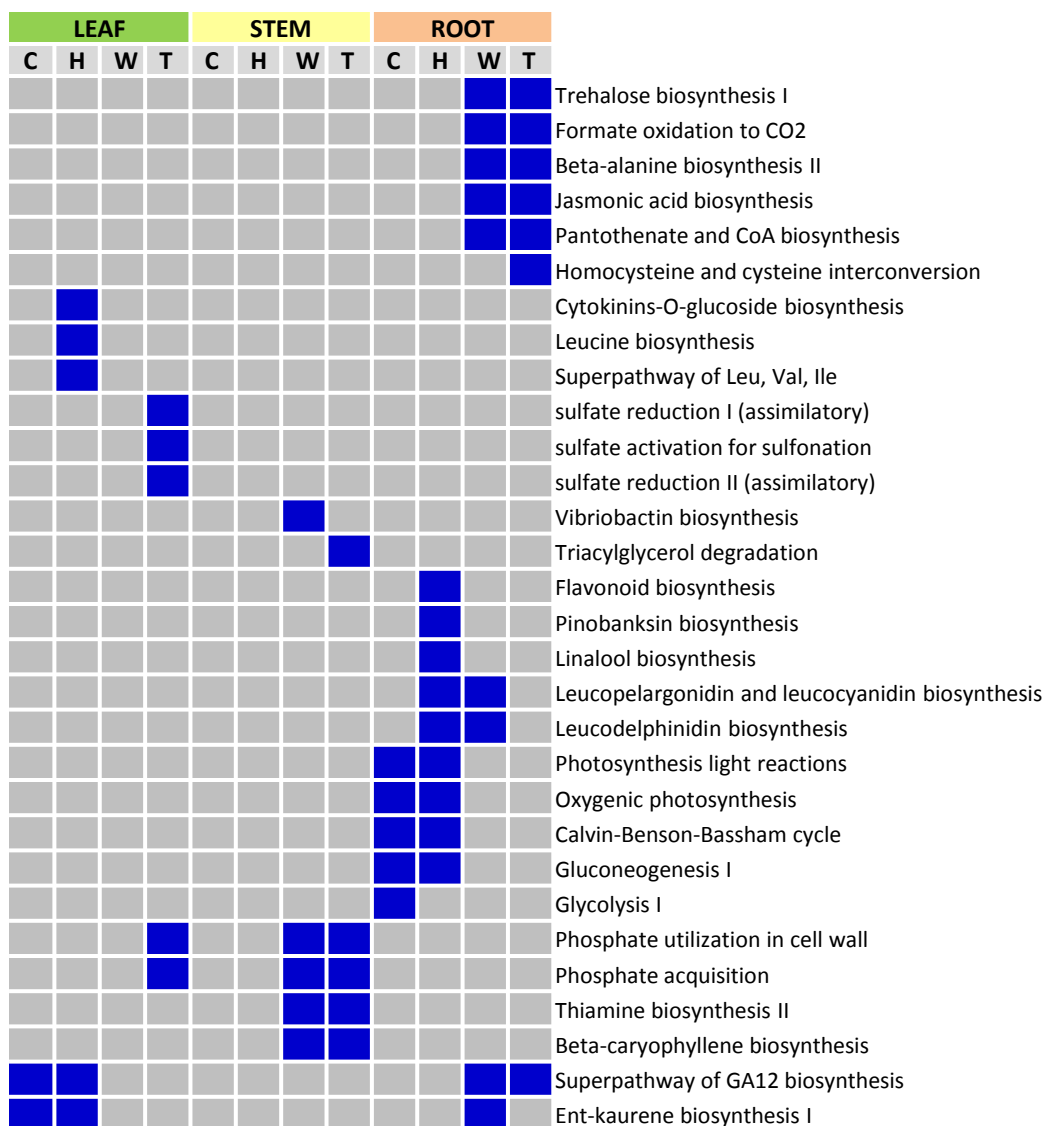

**Additional file 8.** Enriched pathways represented in DEG. Enriched pathways across tissue and sample categories (C, control; H, heat stress; W, wild type; T, transgenic line). Blue indicates statistical significance (FDR < 0.1).
