# Supplementary material for: Expression of OsMYB55 in maize activates stress-responsive genes and enhances heat and drought tolerance
Source: PubMed Central journal article supplement (PMC4850646; doi:10.1186/s12864-016-2659-5), 2016-04-29
Supplement: 12864_2016_2659_MOESM12_ESM.pdf [file 12864_2016_2659_MOESM12_ESM.pdf]

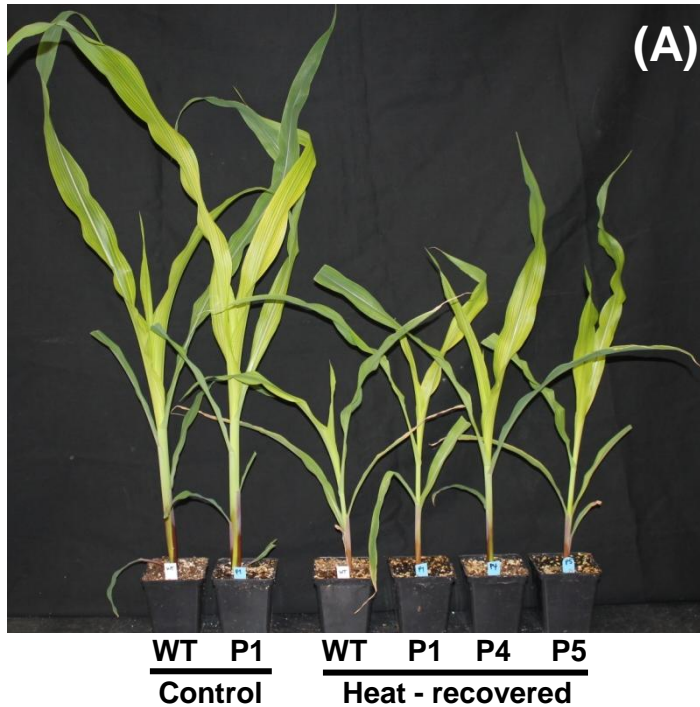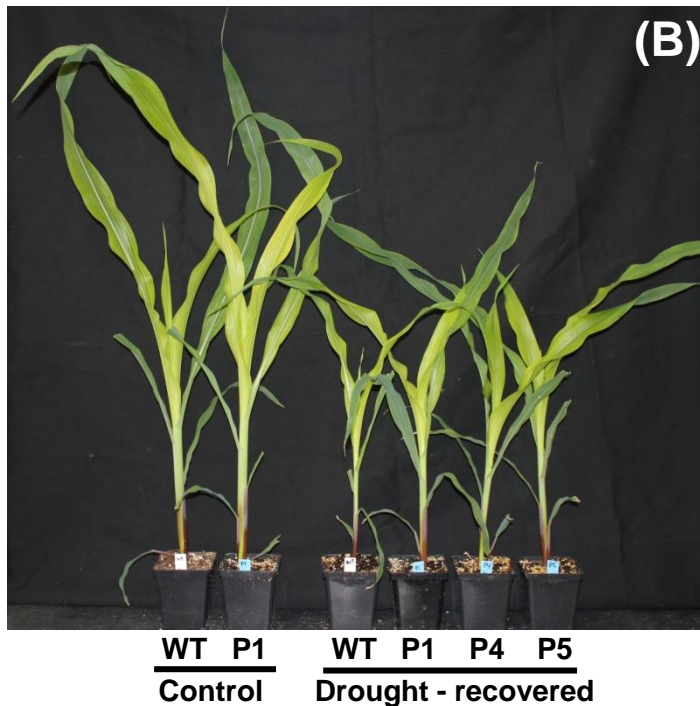

**Additional file 12.** Recovery phenotype from stress treatments of OsMYB55 transgenic maize. **(a)** Wild type (WT) and transgenic plants (P1, P4 and P5) grown under control conditions (see methods) or subjected to high temperature (42 °C / 35 °C, day/night cycle) for five days. Picture was taken seven days after shifting heat-treated plants back to normal temperatures (29 °C / 23 °C, day/night cycle). Control plants were watered and maintained at normal temperatures during the whole experiment. **(b)** WT and transgenic plants subjected to water withholding for five days and then recovered by watering for seven days.
